# Supplementary material for: New data on tail lengths and variation along the caudal series in the non-avialan dinosaurs
Source: PeerJ. 2021 Feb 15;9:e10721. doi: 10.7717/peerj.10721 (PMC7891087; doi:10.7717/peerj.10721)
Supplement: Supplemental Information 1 — Master dataset of all data –Complete tail lengths, Snout-Sacrum lengths, Incomplete tail lengths, Centrum lengths, Transverse Processes, References. [file peerj-09-10721-s001.xlsx]

## Sheet: Complete Tails
Genus	Specimen / Source	Total tail length (mm)	Femur length (mm)	Tail / Femur		Notes
Dryosaurus	YPM 1884	1199	330	3.63333
Othneilosaurus	SMA 0010	1210	265	4.56604
Jeholosaurus	IVPP V 12529	430	91	4.72527
Leaellynasaura	Herne pers comm	869	70	12.4143
Stegosaurus	SMA 0092	1800	760	2.36842
Scutellosaurus	MNA PI. 175	719	82	8.76829
Scleidosaurus	NHM R1111	1760	355	4.95775
Pinacosaurus	PIN 614	2100	400	5.25
Dyoplosaurus	Arbour et al., 2009	1809	562	3.21886
"Saichania"	MPC 100/1305	1610	380	4.23684
Edmontosaurus	Lull and Wright, 1942	3650	980	3.72449
Lambeosaurus	ROM 1218	3328	1080	3.08148
Corythosaurus	ROM 845	3457	1075	3.21581
Hadrosauridae indet	TMP 1998.58.01	1920	525	3.65714
Tenontosaurus	OMNH 63525 and OMNH 34191	2574	470	5.4766		Tail combined from 2 specimens. Femur scaled from…..?
Parksosaurus	ROM 804	1130	260	4.34615
Psittacosaurus	Sereno, 1987	433	157	2.75796
Psittacosaurus	Unnumbered specimen, Sihetun	376	104	3.61538
Psittacosaurus	LPM 0226	222	65	3.41538
Psittacosaurus	IVPP V 120888	510	135	3.77778
Archaeoceratops	IVPP V11115	315	194	1.62371		Estimated from data in You & Dodson, 2003 and Figure 22.2A in You & Diodson, 2004
Leptoceratops	CMN 8888	856.5	265	3.23208		Calculated from Sternberg's 1951 measurements and photo
Leptoceratops	CMN 8887	591	230	2.56957
Leptoceratops	CMN 8889	687	291	2.36082
Protoceratops	Fastovsky et al. 2012	73	26	2.80769
Protoceratops	Fastovsky et al. 2012	64	28	2.28571
Centrosaurus	Brown, 1917	2065	740	2.79054
Anchiceratops'	CMN 8547	1400	740	1.89189
Lufengosaurus	Young, 1941	2385	555	4.2973
Camarasaurus	Gilmore, 1925	2324	568	4.09155
Opisthocoelicaudia	Borsuk-Bialynicka, 1977	4610	1395	3.30466
Spinophorosaurus	Remes et al 2009	6303	1215	5.18765
Coelophysis	AMNH 7229	835	150	5.56667
Gorgosaurus	Currie, 2003	2779	645	4.30853
Ornithomimid	TMP 90.26.01	1595	465	3.43011		Very tip may not be complete as last few caudals are poorly presrved but appears to likely be complete.
Gallimimus	Osmólska et al., 1972	2368	665	3.5609
Ornithomimus	TMP 1995.11.001	1789	424	4.21934
Sinocalliopteryx	JMP-V-05-8-01	1243	237	5.24473
Caudipteryx	IVPP V 12430	199	149	1.33557
Caudipteryx	PMOL 0006	242	185	1.30811
Nomingia	Barsbold et al., 2000	530	285	1.85965
Mei	Xu and Norell, 2004	314	81	3.87654		Ratio given as 3.17 in Godefroit et al.
Jinfengopteryx	CAGS IG 040801	294	80	3.675
Anchiornis	IVPP V 16055	X	X	6.26		Measured from a photo without scale, so values not known but ratio should be correct.
Sinusonasus	Xu & Wang 2004	463	134	3.45522
Microraptor	CYNG 024	X	X	4.7		Measured from a photo without scale, so values not known but ratio should be correct.
Microraptor	CYGYB L 110615	320.5	98	3.27041
Microraptor	IVPP V 13352	517	86	6.01163
Microraptor	Li et al 2012	283	52	5.44231
Changyuraptor	Han et al 2014	576.7	161	3.58199
Epidexipteryx	IVPP V 15471	60	51	1.17647
Eosinopteryx	Godefroidt et al 2013a	119	40	2.975		Ratio given as 2.71 in Godefroidt et al.
Aurornis	Godefroidt et al 2013b	232	65	3.56923
Archaeopteryx	Wellnhofer, 2009	142.5	37	3.85135
Archaeopteryx	Foth et al 2014	181.3	55.3	3.27848

## Sheet: Snout-Sacrum
Genus	Specimen / Source	Snout-sacrum (mm)	Femur length (mm)	Snout-Sacrum/Femur
Jeholosaurus	IVPP V 15719	209	50	4.18
Scelidosaurus	NHM UK R1111	1545	355	4.35211
Scutellosaurus	MNA PI. 175	405	82	4.93902
Liaoningsaurus	IVPP 12560	185	30	6.16667
Tethyshadros	Dalla Vecchia, 2009	1522	420	3.62381
Edmontosaurus	Lull and Wright, 1942	4380	980	4.46939
Edmontosaurus	Lull and Wright, 1942	4668	1118	4.17531
Corythosaurus	Lull and Wright, 1942	4220	590	7.15254
Prosaurolophus	Lull and Wright, 1942	4620	1005	4.59701
Psittacosaurus	IVPP V 120888	485	135	3.59259
Leptoceratops	CMN 8888	856	265	3.23019
Leptoceratops	CMN 8887	591	230	2.56957
Protoceratops	Fastovsky et al. 2012	65	27	2.40741
Protoceratops	Fastovsky et al. 2012	64	28	2.28571
Centrosaurus	Brown, 1917	3195	740	4.31757
Triceratops	Hatcher et al., 1907	4805	1150	4.17826
Lufengosaurus	Young, 1941	2647	555	4.76937
Camarasaurus	Gilmore, 1925	2722	568	4.79225
Diplodocus	Hatcher, 1901	11360	1542	7.36706
Gorgosaurus	Currie, 2003	2321	645	3.59845
Gallimimus	Osmólska et al., 1972	1210	270	4.48148
Caudipteryx	IVPP V 12430	505	149	3.38926
Khaan	IMG 100 /1002	928	195	4.75897
Anchiornis	Hu et al. 2009	247	66	3.74242
Mei	Xu and Norell, 2004	314	81	3.87654
Sinusonasus	Xu & Wang 2004	463	134	3.45522
Microraptor	IVPP V 13352	295	86	3.43023
Changyuraptor	Han et al 2014	576.7	161	3.58199
Jinfengopteryx	CAGS IG 040801	290	80	3.625
Archaeopteryx	Wellnhofer, 1974	165	37	4.45946
Epidexipteryx	IVPP V 15471	158	51	3.09804

## Sheet: Incomplete Tails
Genus	Specimen	Total preserved tail length (mm)	Femur length (mm)	Tail / Femur		Notes
?Heterodontosaurus	MCZ 4188, see as cast TMP	439	53	8.28302		60 preserved, at least 5 missing
Tethyshadros	Dalla Vecchia, 2009	1650	420	3.92857
Corythosaurus	Lull & Wright, AMNH 5240					Illustrated but no data
Anatosaurus	Lull & Wright 8399					Illustrated but no data
Anatosaurus	Lull & wright	4170	1060	3.93396		Implied complete
Psittacosaurus sinensis	IVPP V 738	432	50.6	8.53755		61 caudals
Psittacosaurus	IVPP V14341.1	240	98	2.44898
Psittacosaurus	IVPP V14341.2	117	73	1.60274
Psittacosaurus	IVPP V14341.3	95
Psittacosaurus	IVPP V14341.4	155	69	2.24638
Apatosaurus	Gilmore 1936	10725	2339	4.58529		Described as complete but is not. Some scaling of verts from another specimen.
Ceratosaurus	USNM 4735	2781	620	4.48548
Juravenator	Chiappe & Goehlich, 2010	298	52	5.73077		44 caudals
Sciurumimus	Rauhut et al 2012		1215			No data in paper
Khaan	IGM 100/1127	399	109	3.66055
Sinornithoides	IVPP V9612	484	114	4.24561
Tianyuraptor	Zheng et al 2009	994	205	4.84878		23 caudals
Sinocalliopteryx	Ji et al 2007	110
Sinosauropteryx	Currie & Chen 2001	1226	238	5.15126		?42 caudals
Epidendrosaurus	IVPP V 12653	117	16	7.3125

## Sheet: Centrum Lengths
	Taxon	Kentrosaurus	Dyoplosaurus	Iguanodon	Ouranosaurus	Lambeosaurus	Tenontosaurus	Tethyshadros	Psittacosaurus	Psittacosaurus	Psittacosaurus	Leptoceratops	Leptoceratops	Centrosaurus	Lunfengosaurus	Plateosaurus	Omeisaurus	Opistocoelicaudia	Diplodocus	Apatosaurus	Apatosaurus	Camarasaurus	Coelophysis	Coelophysis	Coelophysis	Dilophosaurus	Ceratosaurus	Majungasaurus	Juravenator	Gorgosaurus	Tyrannosaurus	Ornithomimus	Ingenia	Nomingia	Deinonychus	Velociraptor	Velociraptor	Velociraptor	Microraptor	Archaeopteryx	Archaeopteryx	Archaeopteryx		C. niloticus	V. niloticus
	Specimen number	HMN	ROM 784	IRSNB 1534	ROM Cast	RTMP 1983.038	OMNH 34191	SC 57021	Gi SPS 100/606	AMNH 6254	AMNH 6253	CMN8887	CMN8888	AMNH 5351	IVPP V 15	MBR 4430 C	ZDM 5050	ZPAL MgD-I/48	AMNH 223	CM 3378	CM 3018	CM 11338	AMNH 7223	AMNH 7224	AMNH 7229	UCMP 37302	USNM ?4735	FMNH PR 2100	JME Sch 200	RTMP 91.36.500	FMNH PR2081	TMP 4511001	MPC-D 100/30	MPC-D 100/119	YPM 5203	(AMNH) IGM 100/986	IGM 100/25	MPC 100/985	QM V1002	BSPG1999 I 50	WDC CSG 100	Private		GMZ	GMZ
Centrum Number	Source*	Hennig, 1925	Arbour & Currie, 2013	Direct measurement	Direct measurement	Direct measurement	Direct measurement	Dalla Vecchia, 2009	Sereno, 1997	Sereno, 1997	Sereno, 1997	Direct measurement	Direct measurement	Brown, 1917	Young, 1941	Pittman et al. 2013	Jiang et al. 2011	Borsuk-Bialynicka	Myvrold & Currie	Gilmore, 1936	Gilmore, 1936	Gilmore 1925	Colbert 1989	Colbert 1989	Direct measurement	Direct measurement	Gilmore 1920	O'Connor 2007	Chiappe & Goehlich 2010	Direct measurement	Brochu, 2003	Direct measurement	Direct measurement	Direct measurement	Pittman et al. 2013	Direct Measurement	Direct Measurement	Pittman et al. 2013	Direct Measurement	Munich	Thermopolis	Foth et al. 2014		Pittman et al. 2103	Pittman et al. 2103
1		54		83	82.7	48.9	61.7		18	19	19	17.65	20.42	70	70	0.147	110	12			240	64	28	28	17.9	69.7	79			92.8	202.2	58.2	24.6	28.3	0.0704		14.6		7.7		3.4	4.7		0.113	0.0601
2		50	28	90.3	81.9	42.4	63.6		18	19	17	18.35	19.6	71	63	0.134	93	12			205	63	30	30	16.9	69.7	80		6.2	71.3	203.8	54.9	23.8	29.2	0.0656	18.6	22.6	0.0901		4.5	4.8	4.2		0.129	0.0572
3		50	29	89	78.9	54.5	63.6		17	18	18	18.81	21.1	60.2	63	0.12	100	14		140	215	62	31	32	18.6	69.1	80		6.5	78.3	186.1	52.5	24.4	28.7	0.0645	20.5	23.3	0.0903	8	4.9	5.3	4.1		0.12	0.0562
4		49	29	97	77.9	43.6	62.1	50.8	18		18	17.74	18.43	56.2	63	0.13	110	13.5		145	190	61	32	31	18.8		79		6.5	78.1	197.4	53.9	25.3	27.5	0.0714	23.8	26.5	0.083	6.9	4.2	5.1	4.9		0.113	0.0661
5		51	28	93	74.9	44.5 (fused)	62.9	53.1	19		17	16.46	20.85	48.3	66	0.13	115	13.5		145	190	62	34	30	18.3	78.6	78	84.9	6.4	89.2	184.5	54.4	25.4	27.2	0.0661	25	27.8	0.0803	6.2	Missing?	4.9	4.8		0.112	0.0582
6		54	26	95.6	73.3	56.3	61.5		20		18	17.74	20.45	57.2	68	0.11	115	14			175	62	34	31	15.8	77.2	76	95.7	6.9	90.7	198.6	55.9	26.3	26.4	0.0457	23.1	32.1		7.2	5.5	6.9	5.2		0.109	0.0575
7		55	26	104	73.6	62	59.6		18		17	16.4	19.97	56.2	72	0.0901	117	12.5		140	190	65	33	31.5	17.9	79.8	81	98.1	6.5	92	189.4	52.8	25.9	25.1	0.0483	21.7	31.7	0.0785	18.3	7.7	8.8	5.9		0.105	0.0564
8		54	25	83.4	73.7	65.4		53.6	20		19	15.3	19.51	46.3	74	0.091	115	13.5			175	59	35	32	22.1	79.2	79	98.1	6.4	91.7	184.5	51.8	25.6	23.8	0.0404	23.9	23.4	0.0711	16.8	9.1	8.9	6.3		0.0997	0.0524
9		55	21	84	71.8	63.8	57.7	47.5	19		17	16.49	17.96	53.6	71	0.089	120	14		155	190		34	33.5	18	79.2	78	97	6.4	89.6	189.4	53.6	24.2	23.1	0.0529	24.5	30.3	0.0753		10.4	11.8	6.9		0.0965	0.0596
10		56	60	80	74	63.7	55.8	49	18		17	16.44	17.74	57.5	71	0.0883	120	14		149	185			32.5	20.5	78.2	78	93.1	6.1	89.6	186.1	59.3	23.5	23	0.0545	25.4	26.8	0.0651	23	10.3	9.6	9.3		0.0943	0.0599
11		56	60	96.6	74.2	75.3	56.5	50	18		17	15.86	18.16	57.4	69	0.0795	115	14		150	185		36	31	18.5	74	77	96	6.8	85.5	192.56	49.7	23.9	21.7	0.0427	25	28	0.0528	25.1	10.8	10.2	10.7		0.0907	0.0564
12		56	48	98.5	72.4	66	55.1	52	17		15	16.62	17.45	55.1	69	0.086	117	13.5		147	190	55	36	31.5	20.2	77.4	76	96.7		83.6	188	49.7	22.4	21.1	0.0406	25.9	27.3	0.056	27.3	10.7	12.7	9.3		0.085	0.0701
13		55	49	78.8	?	65.4	55.2	47	16		15	15.58	16.43	55.1	67	0.0704	123	14		160	190	57	36.5	32	18.8	75.5	74	95.6		79.5	199	49.7	20.8	19.3	0.0506	27	34.2	0.0694	21.3	11.3	10.2	11.3		0.0852	0.0661
14		55	54	110.9	76.7	68.8	54.5	51.8	16		15	15.63	15.55	64	66	0.067	120	14		160	200	57	38	38	21.1	77.1		94.2	6.5	81.4	203	53.2	21.7	18.9	0.0438	26.4	32.9	0.0639	26.9	9.6	11.3	11.3		0.0837	0.0647
15		55	59	95.9	72.1	67.5	52.3	43	16		15	14.76	15.54	60	66	0.0739	120	14		167	195	58	35	38	20.2			91.4		85.5	197	52.2	20	18.3	0.0377	25	27.9		24.5	10.2	10.8	12.2		0.0828	0.057
16		56	50	107.9	67.9	68.6	50.5	44.7	15	16	15	15.33	15.71	55.5	66	0.0719	121	14		170	200	58	34	40	19.3	76.9		91.5		76.4	197.7	53	19.6	18.6	0.0402		31.3		27.4	9.9	11.2	12.7		0.0851	0.0691
17		55	59	95.4	71.5	70.5	50.1	47.8	14	14	15	14.9		57.4	63	0.0638	128	15		172	200	58	36.5	42	20.5	77.6		90.4	6.8	83	187.1	55	17.9	19.2	0.0293	25.1		0.0567	22.1	7	11.2	12		0.0843	0.0634
18		55		105.3	76.3	73.2	50.5	43	14	13	15	14.9	16.69	60	62	0.057	128	15.5		178		60	36		21	77.9	62	91.1	7.2	77.4	195.3	59.4	18	19.6	0.0282	25.1	30.9		21.9	6.8	10.7	10.5		0.0795	0.0462
19		54		99.8	74.2	68.7		42.7	14	14	14	15.26	16.06	55.1	62	0.0539	124	15		181	205	59	36.5		20.2	80.8	58	90.9	7.5	75.4	181.2	62.1	15.3	19.4	0.0301	24.6	31.7		18.7	7.4	9.2	9.5		0.0758	0.0529
20		56		113	73.8	62.9		41.4	13	14	13	15.9	15.46	57.5	62	0.0568	120	15		183	200	60	37		23.8	80.7		88.7	7.5	73.1	179.1	64.6	15.1	16.2	0.0229	24.6			18.7	4.9	8.6	8.4		0.0716	0.0529
21		54		102.9	71.8	67.1	45.6	41.3	13	13	13	15.23	15.53	53.3	58	0.0492	120	15		161	200	58	37		22.5	78.6	59	86.6	7.6	72	158	64.5	15.6	18.6	0.0196	21.3	27.6	0.0487	14.4	5.2	Last centrum may be incomplete	7.4		0.0649	0.0426
22		54		101.9	73.6	68.9	43.4	42	13	13	13	15.63	19.98	53.1	58	0.0485	125	15		174	225	58	36		20.3	80.8	62	83.5	7.6	70	162.4	63.9	15.9		0.0212	20.7	27.5	0.0471	14.8	3.9		4.9		0.0644	0.0516
23		53		96	71.2	62.2	41.4	39.5	12	13	12	14.79	15.97	52.9	58	0.0511	120	15		170	210	56	38		23.6	79.6	58	81.6	7.9	67.8	156.2	63.5	14.9		0.0193	21.5	25.9	0.0364	16.2	3.5		4.8		0.0642	0.0534
24		50		98.9	73.2	60.3	40.8	41	12	13	12	14.15	15.82	52.9	57	0.052	120	15		177		55	42		23.5	78.5	58	79.2	7.7	67	143	63.2	13.1		0.0214	20.8						Centrum 9 is concealed		0.0589	0.048
25		48		95.4	70	55	40.4	40	12	13	11	12.83	13.98	46.3	56	0.0448	120	14.5		168		55	44		24.6	75.9	56	79	8	65.7	147.4	60.2	13.8		0.0218	19.6	30.5	0.0372						0.0596	0.051
26		38		111.7	68.6		39.2	37.4	11	12	11	12.84	13.09	48.5	56	0.0424	115	14		165	195	53	44		24.3	79.2		76.6	8	64	156.2	57.8	12.4		0.0174		26.1	0.041						0.0529	0.048
27		38		96.6	67.9	57.6	37.5	37.6	1	12	11	14.2	14.68	39.9	55		115	14		165	205	52	42		22.1	78.3	55	74.6	8.4	57.1	111.3	53	10.5		0.0161		24	Femur length 187 mm						0.0467	0.0446
28		43		98.5	62.9	57.1	35.5	35.9	1	12	11	13.41	13.51	43.9	52			13.5		150	188	50	43		22.1	77.8	51	70.8	8.4	54.5	123.6	50.3	10.1		0.0133		19.2							0.0569	0.0421
29				95.8	61.9	53.7	34.6	34.5	1	12	1	10.52	14.68	39.7	51	0.0303		Data does not include the ball of the centrum		145	190	49	43		38.2	75.5	48	67.5	8.3	51	116.5	44.4	10		0.0119		18.8							0.0512	0.0418
30				101.9	57.7	52.7	34.8	33.7	9	11	9	10.82	14.37	42.4	50	0.0377				140	200	47	42		30.7	75	49		8.3	45.5	108.6	40.3			0.0089									0.0418	0.0407
31				110	59	53.3	33.7	35.2	1	11	9	13.01	13.3	35.9	50					135	180	45	42		28.2	75.2	48		8.2	39.6	103.3	34.9			Femur length 336 mm									0.0368	0.0451
32				104	56.7		32.1	31.3	9		8	12.17	12.79	39.2	52	0.0385				139	175	43			24.2	73.4	50		8.3	32.7	93.7	32.3												0.0377	0.044
33				66.8	52.8	50.7	27.9		9	1	8	10.5	12.65	37.5	50	0.0348			145	132	170	41			20.7	70.6	47		8.3	29.6	79.6	29												0.0312	0.0462
34				72	46.1	43.8	28.6		8	1	8	11.28	12.59	32.8	47	0.0306			150	140	153	39			19.8	69.6	47		8.3	22.2	81.3													0.0263	0.0413
35				83.9	40	41.7	28.4		8	1	7	10.49	13.2	34.3	48	0.0278			153	122	174	37			20.1	69.5	43		8.3	19.4	76.1													0.0237	0.0462
36					39.5	42.9	28		8	1	7	11.9	12.7	31.3	40	0.0256			155	123	144	35			14		41		8	16.4	72.3													0.0127	0.0426
37				92.2	40	44.1	27.4		7	8	6		13.02	33.1	40	0.0236			150			32			16.1		40		7.9	11.2	Centra 26 and 27 are pathological													0.0116	0.041
38				87		44.1	29.2			8	6		10.3	31.8	31	0.0217					145	30					39		7.7															0.0099	0.0397
39				85.2		38.8	26.6			7	6		10.09	30	27	0.0193			145		154	29					39		7.6															Femur length 208 mm	0.0402
40						42.3	27.1			7	5		10.88	25.7	32	0.0222			140		145	29				53.5	36		7.6																0.0345
41						35.8	32.1			6	4		8.73	23.8	31	0.0194			130	120	145	27					35		7.5																0.0384
42				77.4		41.1	35.3			5	3		9.36	20.9	28	0.0204			125	130	135	26					30		7.5																0.041
43				82.2		40.4	34.7						7.98	14.8	25	0.0165			115	120	133	25					29		7.2																0.0318
44				98.6		35.4							8.06	18.2		Femur length 673 mm			110	120	135	25					32																		0.0381
45				76		36.5							7.21	14.8					105	120	124	24					28																		0.0389
46				75.1		37							7.48	4.9					96	115	130	22					26																		0.0307
47				78.5		36.5							6.26						95	118	120	22					24																		0.0353
48				72.4		41.3							5.24						90	125	128	19					20																		0.0353
49				65.9		37.7							6.26						87	110	120	18					18																		0.0323
50				52.6		41							5.24						85	122	135	15					18																		0.0334
51				51.3		41.6													80	115	130	14																							0.035
52				25.4		33.9													65	110		13																							0.0324
53						31.6													73	125																									0.0302
54						31.2													72	123																									0.0297
55						34.6													65	130																									0.0288
56						38													67	120																									0.0343
57						38.4													66	112																									0.0299
58						39													62																										0.0286
59						32.2														116																									0.0286
60						34.2														115																									Femur length 63 mm
61						32.4														120
62						29.6													57	56
63						30.8													55	110
64						31.2													56	115
65						26.3													54	110
66						21.2													50	112
67						25													50	120
68						19.2													51	120
69																			46	110
70																			44	95
71																				85
72																				90
73																				85
74																			40
75																			41	70
76																			39	60
77																			42	83
78																				83
79																				62
80																			45	55
81																			43	52
82																			38	85
83																				50
84																				42
* All lengths are in mm except those of Pittman et al. (2013) which were scaled according to the length of the femur
Empty cells indicate centra that could not be measured or were missing / obscured. Some notes are added as appropriate to cells when things are not clear.

## Sheet: Transverse Processes
			These data are for the Centrum Lengths tab. Data taken from specimens, the literature or photos. See previous tab of sources of information.
Genus	Caudal vertebra with last set of transverse processes
Kentrosaurus	26
Dyoplosaurus	12
Iguanodon	12
Centrosaurus	25
Ouranosaurus	19
Tethyshadros	14
Tenontosaurus	10
Lambeosaurus	15
Psittacosaurus AMNH 6253	24
Psittacosaurus AMNH 6254	22
Leptoceratops CMN 887	21
Leptoceratops CMN 888	18
Plateosaurus	32
Apatosaurus	16
Camarasaurus	14
Diplodocus	16
Opistocoelicaudia	16
Omeisaurus	19
Coelophysis	19
Dilophosaurus	17
Juravenator	15
Majungasaurus	25
Gorgosaurus	12
Tyrannosaurus	17
Ornithomimus	14
Nomingia	18
Velociraptor	11
Deinonychus	12
Microraptor	6
Crocodylus niloticus	15
Varanus niloticus	17

## Sheet: Hadrosaur replicates
TMP1998.058.001		From Photos
	1	2	3	4	5	6	7	8	9	10	11	12	13	14	15	16	17	18	19	20	21	22	23	34	25	26	27	28	29	30	31	32	33	34	35	36	37	38	39	40	41	42	43	44	45	46	47	48	49
1	???	28.2854	24.6606	36.6549	28.2854	30.3217	26.9278	27.1518	33.2609	30.3217	31.9033	32.5821	31.0005	31.6793	32.3581	32.5821	???	???	???	???	???	???	???	???	???	28.5877	26.3885	28.5844	28.2734	29.0588	30.1073	29.5811	28.9292	28.0103	28.5365	29.0588	27.7512	25.1319	28.7957	28.2734	27.4881	26.7027	25.1319	24.0835	26.9658	25.9173	25.6542	23.5612	23.0389
2	???	31.2245	27.8306	29.4122	28.2854	31.4485	31.2245	32.5821	33.2609	32.3581	31.9033	34.1637	32.1273	32.1273	34.8425	32.1273	???	???	???	???	???	???	???	???	???	30.6296	27.331	29.6871	26.31	27.0954	27.0954	28.2734	28.2734	28.6661	29.4515	29.0588	26.31	25.5246	27.8807	28.2734	26.7027	26.31	26.31	23.7575	26.1137	26.7027	27.0954	23.5612	22.9722
3	???	30.3217	28.7334	28.5094	26.9278	30.3217	28.0546	31.4485	34.3945	31.2245	31.9033	35.5213	32.1273	31.2245	34.8425	32.1273	???	???	???	???	???	???	???	???	???	28.2734	24.7393	26.8598	27.0954	28.8232	25.9173	29.4515	27.6844	28.2734	27.8807	27.8807	25.9173	24.3466	27.4881	26.7027	27.0954	24.7393	24.7393	24.111	25.721	25.5246	25.9173	23.5612	22.3831
4	???	30.3217	27.8306	31.6793	28.5094	31.4485	26.9278	31.4485	34.3945	31.2245	28.9642	35.5213	32.1273	32.1273	34.8425	32.3581	???	???	???	???	???	???	???	???	???	29.6871	25.9173	24.9749	25.5246	25.1319	26.7027	29.0588	26.31	26.31	28.6661	27.0954	25.9173	24.7393	27.8807	27.4881	27.4881	24.7393	26.1137	22.3831	25.1319	26.7027	26.7027	22.7758	23.1685
5	???	30.091	28.8488	34.2791	28.8488	31.9033	29.643	29.0524	33.9397	31.9033	26.9278	34.2791	32.9215	34.2791	34.9579	32.5821	???	???	???	???	???	???	???	???	???	28.7447	25.4461	25.9173	26.31	26.31	28.6661	29.4515	28.0771	24.7393	27.8807	28.2734	26.7027	25.9173	27.8807	27.8807	26.31	25.1319	25.9173	24.3466	23.1685	26.7027	25.5246	23.9539	23.1685
6	???	31.2245	29.1882	39.3701	30.8851	31.9033	30.2064	34.2791	33.9397	31.9033	27.4912	38.6913	32.5821	34.2791	34.9579	32.9215	???	???	???	???	???	???	???	???	???	28.7447	25.9173	25.4461	25.9173	27.8807	25.6424	27.0954	26.7027	26.7027	27.4881	28.2734	27.8807	24.7393	27.4881	25.9173	27.4881	25.9173	25.1319	24.1502	24.1502	27.0954	26.31	23.9539	22.7758
7	???	29.1882	30.8851	37.6731	30.2064	31.9033	30.2064	34.2791	33.9397	31.9033	30.8851	38.6913	32.9215	34.2791	36.6549	34.6185	???	???	???	???	???	???	???	???	???	31.7134	24.3481	26.954	27.6844	26.1922	27.0954	27.0954	27.0954	27.2917	27.8807	26.899	26.899	26.5063	27.2917	27.0954	26.31	25.5246	25.5246	22.7758	25.9173	28.2734	24.9356	23.5612	22.7758
8	???	29.1882	27.8306	31.9033	30.2064	31.2245	30.2064	32.9215	33.9397	31.5639	34.9579	36.3155	31.9033	31.5639	37.3337	31.5639	???	???	???	???	???	???	???	???	???	30.7709	27.331	27.9436	25.9173	26.4278	27.2132	27.7629	28.5483	27.7629	27.9986	27.9986	27.4881	25.4068	27.9986	28.2734	27.4881	26.1922	25.1319	24.6215	25.7995	26.4278	25.6424	23.5612	22.7758
9	???	29.867	26.1336	35.2973	30.2064	32.9215	30.8851	31.7676	33.9397	33.2609	32.9215	35.9761	31.9033	31.5639	37.3337	32.9215	???	???	???	???	???	???	???	???	???	28.6033	25.4461	29.5457	25.9173	26.31	28.6661	27.4881	27.8807	26.31	27.4881	27.4881	26.31	24.3466	28.7839	26.8205	27.9986	25.1319	25.4068	24.6215	25.7995	27.0954	24.3466	23.9539	22.7758
10	???	29.867	28.17	33.2609	29.867	32.9215	30.8851	31.7676	33.9397	31.5639	30.5458	35.9761	31.9033	31.5639	34.6185	32.2427	???	???	???	???	???	???	???	???	???	30.7709	24.1738	28.5892	25.395	25.6424	26.7027	27.9986	27.4881	26.9658	27.9986	27.9986	27.4881	25.9173	28.5365	27.9986	26.9658	24.3466	25.9173	22.2535	24.0717	28.2734	24.6097	23.2863	23.2863
TMP1998.058.001		From the specimen
	1	2	3	4	5	6	7	8	9	10	11	12	13	14	15	16	17	18	19	20	21	22	23	34	25	26	27	28	29	30	31	32	33	34	35	36	37	38	39	40	41	42	43	44	45	46	47	48	49
1	???	31.39	31.66	32.22	30.68	30.94	30.99	31.3	32.4	29.52	30.97	36.07	31.22	30.87	31.4	31.72	???	???	???	???	???	???	???	???	???	26.98	25.05	26.2	26.07	26.25	24.98	25.71	25.13	25.14	25.31	25.32	26.5	23.74	25.65	24.82	24.47	22.9	23.12	21.11	21.81	23.1	22.03	21.05	20.15
2	???	31.09	30.29	31.18	30.19	28.7	31.45	31.01	32.22	29.74	31.45	36.72	31.05	32.17	31.56	31.56	???	???	???	???	???	???	???	???	???	27.24	26.44	26.78	26.67	24.89	25.02	25	25.78	25.28	24.73	24.78	25.49	22.68	25.18	24.5	23.9	22.51	22.32	20.81	23.1	23.11	21.64	20.56	20.46
3	???	30.93	30.14	31.8	30.52	31.6	31.53	31.33	32.2	30.08	31.37	36.19	32.24	31.64	31.38	31.13	???	???	???	???	???	???	???	???	???	26.83	25.1	26.78	26.48	26.08	25.75	26.77	26.02	25.98	25.21	25.93	25.96	22.94	25.64	25.19	25.16	22.74	23.15	20.46	22.66	22.88	21.48	21.2	20.26
4	???	28.85	30.56	32.57	29.83	31.22	31.78	31.03	31.62	29.45	30.89	36.09	31.6	31.35	31.7	31.05	???	???	???	???	???	???	???	???	???	26.02	25.04	27.15	27.1	25.67	25.86	25.55	25.13	25.68	25.32	24.94	26.02	23.82	26.01	24.03	24.28	22.67	22.91	21.04	22.48	22.9	20.87	21.09	20.02
5	???	29.25	29.82	31.52	29.55	32.47	31.09	31.4	31.37	30.3	31.53	36.11	31.34	31.29	31.78	31.02	???	???	???	???	???	???	???	???	???	27.09	25.91	26.93	26.56	26.88	25.53	25.02	25.85	25.57	25.39	24.67	25.87	22.78	25.9	24.33	24.47	22.81	23.16	20.82	22.42	22.89	21.16	20.67	20.42
6	???	29.12	29.99	32.27	30.49	32.8	31.03	31.4	32.12	30.21	31.41	36.48	32.17	31.81	31.09	31.17	???	???	???	???	???	???	???	???	???	27.66	25.26	26.42	26.17	26.54	25.08	26.65	25.42	25.44	25.81	25.32	25.81	23.25	25.22	24.92	24.53	22	22.31	20.84	22.71	23.08	21.3	20.78	19.93
7	???	29.75	29.44	31.58	30.15	31.4	30.47	31.04	32.35	31	30.96	36.65	31.13	31.17	31.33	31.12	???	???	???	???	???	???	???	???	???	27.35	26.62	26.66	26.66	25.98	25.7	26.02	25.23	25.89	25.44	25.08	25.91	22.77	25.45	24.82	24.06	22.44	22.82	20.62	22.09	23.01	21.01	20.62	20.04
8	???	30.13	29.97	32.1	29.88	31.89	30.21	31.47	32.24	30.99	30.86	36.8	31.63	31.78	30.73	30.61	???	???	???	???	???	???	???	???	???	26.55	25.33	26.54	26.58	24.8	25.67	25.58	25.68	25.24	25.87	25.65	25.02	23.34	25.05	24.34	25.02	22.67	22.3	20.83	21.75	22.73	21.48	21.01	20.06
9	???	30.08	29.35	32.31	30.84	31.51	30.11	31.56	31.11	30.21	30.92	37.02	31.52	32.13	30.74	30.57	???	???	???	???	???	???	???	???	???	27.02	26.04	26.28	26.72	25.23	25.08	25.72	25.01	25.4	25.42	24.7	26.71	23.81	25.72	24.29	24.35	22.12	23.01	20.73	22.08	22.92	21.33	20.72	20.38
10	???	29.27	30.53	31.35	29.92	32.39	29.56	31.84	31.25	29.89	29.62	35.88	30.62	28.9	30.72	31.23	???	???	???	???	???	???	???	???	???	27.9	26.03	25.98	26.04	24.52	25.93	26.27	25.84	25.52	25.52	24.47	25.83	23.91	25	24.33	24.63	22.85	22.89	20.8	22.23	22.74	20.79	20.28	19.7
[truncated: 28 more columns]

## Sheet: References
Museum Abbreviations			References
AMNH	American Museum of Natural History, New York		Arbour, V.M., Currie, P. J. 2013. Euoplocephalus tutus and the diversity of ankylosaurid dinosaurs in the Late Cretaceous of Alberta, Canada, and Montana, USA. PloS one, 8(5):e62421.
IRSNB	Institut royal des Sciences naturelles de Belgique, Brussels		Arbour, V. M., Burns, M.E., Sissons, R.L. 2009. A redescription of the ankylosaurid dinosaur Dyoplosaurus acutosquameus Parks, 1924 (Ornithischia: Ankylosauria) and a revision of the genus. Journal of Vertebrate Paleontology, 29:1117–1135.
BSPG	Bavarian State Collection for Palaeontology, Munich		Barsbold, R., Osmólska, H. Watabe, M. Currie, P.J., Tsogtbaatar, K. 2000. New oviraptorosaur (Dinosauria, Theropoda) from Mongolia: the first dinosaur with a pygostyle. Acta Palaeontologica Polonica 45:97–106.
CAGS	Chinese Academy of Geological Sciences, Beijing		Brown, B. 1917. A complete skeleton of the horned dinosaur Monoclonius, and description of a second skeleton showing skin impressions. Bulletin of the American Museum of Natural History 37:281–306.
CMN	Canadian Museum of Nature, Ottawa		Chiappe, L. M., Göhlich, U.B. 2010. Anatomy of Juravenator starki (Theropoda: Coelurosauria) from the Late Jurassic of Germany. Neues Jahrbuch für Geologie und Paläontologie-Abhandlungen, 258, 257-296.
CYNG	Chaoyang National Geopark, Chaoyang		Colbert, E. H. 1989. The Triassic dinosaur Coelophysis. Museum of Northern Arizona Bulletin 57:1–160.
CM	Carnegie Musuem of Nature, Pittsburgh		Currie, P. J., Chen, P. 2001. Anatomy of Sinosauropteryx prima from Liaoning, northeastern China. Canadian Journal of Earth Sciences 38:1705–1727.
FMNH	Field Museum of Natural History, Chicago		Currie, P.J. 2003. Cranial anatomy of tyrannosaurid dinosaurs from the Late Cretaceous of Alberta, Canada. Acta Palaeontologica Polonica 48:191–226.
Gi SPS	Geological Institute Section of Palaeontology and Stratigraphy, the Academy ofSciences of the Mongolian People's Republic, Ulan Bator		Dalla Vecchia, F. 2009. Tethyshadros insularis, a new hadrosauroid dinosaur (Ornithischia) from the Upper Cretaceous of Italy. Journal of Vertebrate Paleontology 29:1100–1116.
GMZ	Grant Museum of Zoology and Comparative Anatomy, London		Dal Sasso, C.S., Maganuco, E., Buffetaut, E., Mendez, M.A. 2005. New information on the skull of the enigmatic theropod Spinosaurus, with remarks on its size and affinities. Journal of Vertebrate Paleontology 25:888–896.
HMN (also MBR)	Humboldt Museum of Nature, Berlin		Fastovsky, D.E., Weishampel, D.B., Watabe, M., Barsbold, R., Tsogtbaatar, K., Narmandakh, P. 2011. A nest of Protoceratops andrewsi (Dinosauria, Ornithischia). Journal of Vertebrate Paleontology 85:1035-1041.
IGM	Mongolian Institute of Geology, Ulaan Bataar		Foth, C., Tischlinger, H., & Rauhut, O.W. 2014. New specimen of Archaeopteryx provides insights into the evolution of pennaceous feathers. Nature, 511: 79-82.
IVPP	Institute of Vertebrate Paleontology and Paleonathropology, Beijing		Gilmore, C.W. 1925. A nearly complete articulated skeleton of Camarasaurus, a saurischian from the Dinosaur National Monument, Utah. Memoirs of the Carnegie Museum 10:347–384.
JME	Jura Museum, Eichstätt		Gilmore, C.W. 1936. Osteology of Apatosaurus, with special reference to specimens in the Carnegie Museum. Memoirs of the Carnegie Museum 11:175–271.
JMP	Jinzhou Museum of Paleontology, Jinzhou		Godefroit, P., Cau, A., Dong-Yu, H., Escuillié, F., Wenhao, W., Dyke, G. 2013. A Jurassic avialan dinosaur from China resolves the early phylogenetic history of birds. Nature 498:539-362.
LPM	Liaoning Provincial Museum of Paleontology, Liaoning		Godefroit, P., Demuynck, H., Dyke, G., Hu, D., Escuillié, F., & Claeys, P. 2013. Reduced plumage and flight ability of a new Jurassic paravian theropod from China. Nature communications, 4:1394.
MCZ	Museum of Comparative Zoology, Cambridge		Han, G., Chiappe, L.M., Ji, S.A., Habib, M., Turner, A.H., Chinsamy, A., Han, L. 2014. A new raptorial dinosaur with exceptionally long feathering provides insights into dromaeosaurid flight performance. Nature communications, 5.
MNA	Museum of Northern Arizona, Flagstaff		Hatcher, J.B. 1901. Dipoldocus Marsh, its osteology, taxonomy and probable habits, with a restoration of the skeleton. Memoirs of the Carneigie Museum 1:1–64.
MPC	Mongolian Paleontological Center, Mongolian Academy of Sciences, Ulaanbaatar		Hatcher, J.B., Marsh, O.C., Lull, R.S. 1907. The Ceratopsia. U.S. Geological Survey Monographs 49:1–300.
NHM	Natural History Museum, London		He, T., Wang, X., Zhou, Z. 2008. A new genus and species of caudipterid dinosaur from the Lower Cretaceous Jiufotang Formation of western Liaoning, China. Vertebrata PalAsiatica 46:178–189.
OMNH	Sam Noble Oklahoma Museum of Natural History, Norman		Hennig, E. 1925. Kentrurosaurus aethiopicus; die Stegosaurierfunde vom Tendaguru, Deutsch-Ostafrika. Palaeontographica-Supplementbände, 101-254.
PIN	Palaeontological Institute, Russian Academy of Sciences, Moscow		Ji, S., Ji, Q., Lu J., Yuan, C. 2007. A new giant compsognathid dinosaur with long filamentous integuments from Lower Cretaceous of Northeastern China. Acta Geologica Sinica, 81: 8-15.
PMOL	Palaeontological Institute Shanyang Normal University, Shenyang		Jiang, S. Li, F., Peng, G.-Z., Ye, Y. 2011. [A new species of Omeisaurus from the Middle Jurassic of Zigong, Sichuan]. Vertebrata PalAsiatica 49:185-194
QM	Qijiang Dinosaur National Geological Park Museum, Qijiang		Lull, R. S., Wright, N.E. 1942. Hadrosaurian dinosaurs of North America. Geological Society of America, Special Papers 40:1–242.
ROM	Royal Ontario Museum, Toronto		Marsh, O.C. 1884. Principal characters of American Jurassic dinosaurs, Part VII. On the Diplodocidae, a new family of Sauropoda. American Journal of Science, Series 33:411–416.
SC	State Collection of Italy, Rome		Myhrvold, N.P., Currie, P.J. 1997. Supersonic sauropods? Tail dynamics in the diplodocids. Paleobiology, 23:393-409.
SMA	Aathal Dinosaur Museum, Zurich		O'Connor, P.M. 2007. The postcranial axial skeleton of Majungasaurus crenatissimus (Theropoda: Abelisauridae) from the Late Cretaceous of Madagascar. Journal of Vertebrate Paleontology, 27(S2):127-163.
TMP	Royal Tyrrell Museum of Paleontology, Drumheller		Osmólska, H., Roniewicz, E. Barsbold, R. 1972. A new dinosaur Gallimimus bullatus n. gen., n. sp. (Ornithomimidae) from the Upper Cretaceous of Mongolia. Palaeontologica Polonica 27:103–143.
UCMP	University of California Museum of Paleontology, Berkeley		Ostrom, J.H. 1969. Osteology of Deinonycus antirrhopus, an unusual theropod from the Lower Cretaceous of Montana. Bulletin of the Peabody Museum of Natural History 30:1–165.
USNM	Smithsonian Museum of Natural History, Washington DC		Pittman, M., Gatesy, S.M., Upchurch, P., Goswami, A., Hutchinson, J.R. 2013. Shake a tail feather: the evolution of the theropod tail into a stiff aerodynamic surface. PloS ONE, 8:e63115.
WDC	Wyoming Dinosaur Centre, Thermopolis		Rauhut, O.W., Foth, C., Tischlinger, H., Norell, M.A. 2012. Exceptionally preserved juvenile megalosauroid theropod dinosaur with filamentous integument from the Late Jurassic of Germany. Proceedings of the National Academy of Sciences, 109:11746-11751.
YPM	Yale Peabody Museum, New Haven		Remes, K., Ortega, F. Fierro, I. Joger, U. Kosma, R., Ferrer, J.M.M. 2009. A new basal sauropod dinosaur from the Middle Jurassic of Niger and the early evolution of Sauropoda. PLoS ONE 4:e6924.
ZDM	Zigong Dinosaur Museum		Sereno, P.C. 1987. The ornithischian dinosaur Psittacosaurus from the Lower Cretaceous of Asia and the relationships of the Ceratopsia. Ph.D. Dissertation, Columbia University, New York, 554 pp.
ZPAL	Institute of Paleobiology, Polish Academy of Sciences, Warsaw		Sternberg, C.M. 1951. Complete skeleton of Leptoceratops gracilis Brown from the Upper Edmonton Member of the Red Deer River, Alberta. Bulletin of the National Museum of Canada 123:225–255.
			Wellnhofer, P. 1974. Das fünfte Skelettexemplar van Archaeopteryx. Palaeontographica, Abteliung A 147:169–216.
			Wellnhofer, P. 2008 Archaeopteryx: Icon of Evolution. Verlag Dr. Friedrich Pfeil, Munich, 208 pp.
			Xu, X., Norell, M.A. 2004. A new troodontid dinosaur from China with avian-like sleeping posture. Nature 431:838–841.
			Xu, X., Wang, X. 2004. A new troodontid (Theropoda: Troodontidae) from the lower Cretaceous Yixian Formation of western Liaoning, China. Acta Geologica Sinica‐English Edition, 78: 22-26.
			Young, C.C. 1941. A complete osteology of Lufengosaurus huenei Young (gen. et sp. nov.) from Lufeng, Yunnan, China. Palaeontolgica Sinica, Series C 7:1–53.
			Zhang, F., Zhou, Z. Xu, X., Wang, X. 2002. A juvenile coelurosaurian theropod from China indicates arboreal habits. Naturwissenschaften 89:394–398.
			Zhang, F., Zhou, Z. Xu, X., Wang, X.,Sullivan, C. 2008. A bizarre Jurassic maniraptoran from China with elongate ribbon-like feathers. Nature 455:1105–1108.
			Zhang, Z., Xu, X., Zhao, X., Sereno, P.C., Kwang, X. Tan, L. 2001. A long-necked therizinosauroid dinosaur from the Upper Cretaceous Iren Dabasu Formation of Nei Mongol, People’s Republic of China. Vertebrata PalAsiatica 39:282–290.
			Zheng, X., Xu, X., You, H., Zhao, Q., Dong, Z. 2009. A short-armed dromaeosaurid from the Jehol Group of China with implications for early dromaeosaurid evolution. Proceedings of the Royal Society B: Biological Sciences, 277:211-217.
